# Supplementary material
Source: HighWire-hosted journal article supplement (http://www.ajevonline.org/highwire/filestream/10157/field_highwire_adjunct_files/0/Supplemental_Data.pdf)
Supplement: Supplemental_Data.pdf [file Supplemental_Data.pdf]

**Supplemental Data for:**

Balint G and Reynolds AG. 2017.

Irrigation strategies impact Baco noir grapevines in Ontario. I. Vine physiology, vine size, and yield components.

Am J Enol Vitic 68:293-309. doi: 10.5344/ajev.2017.16093.

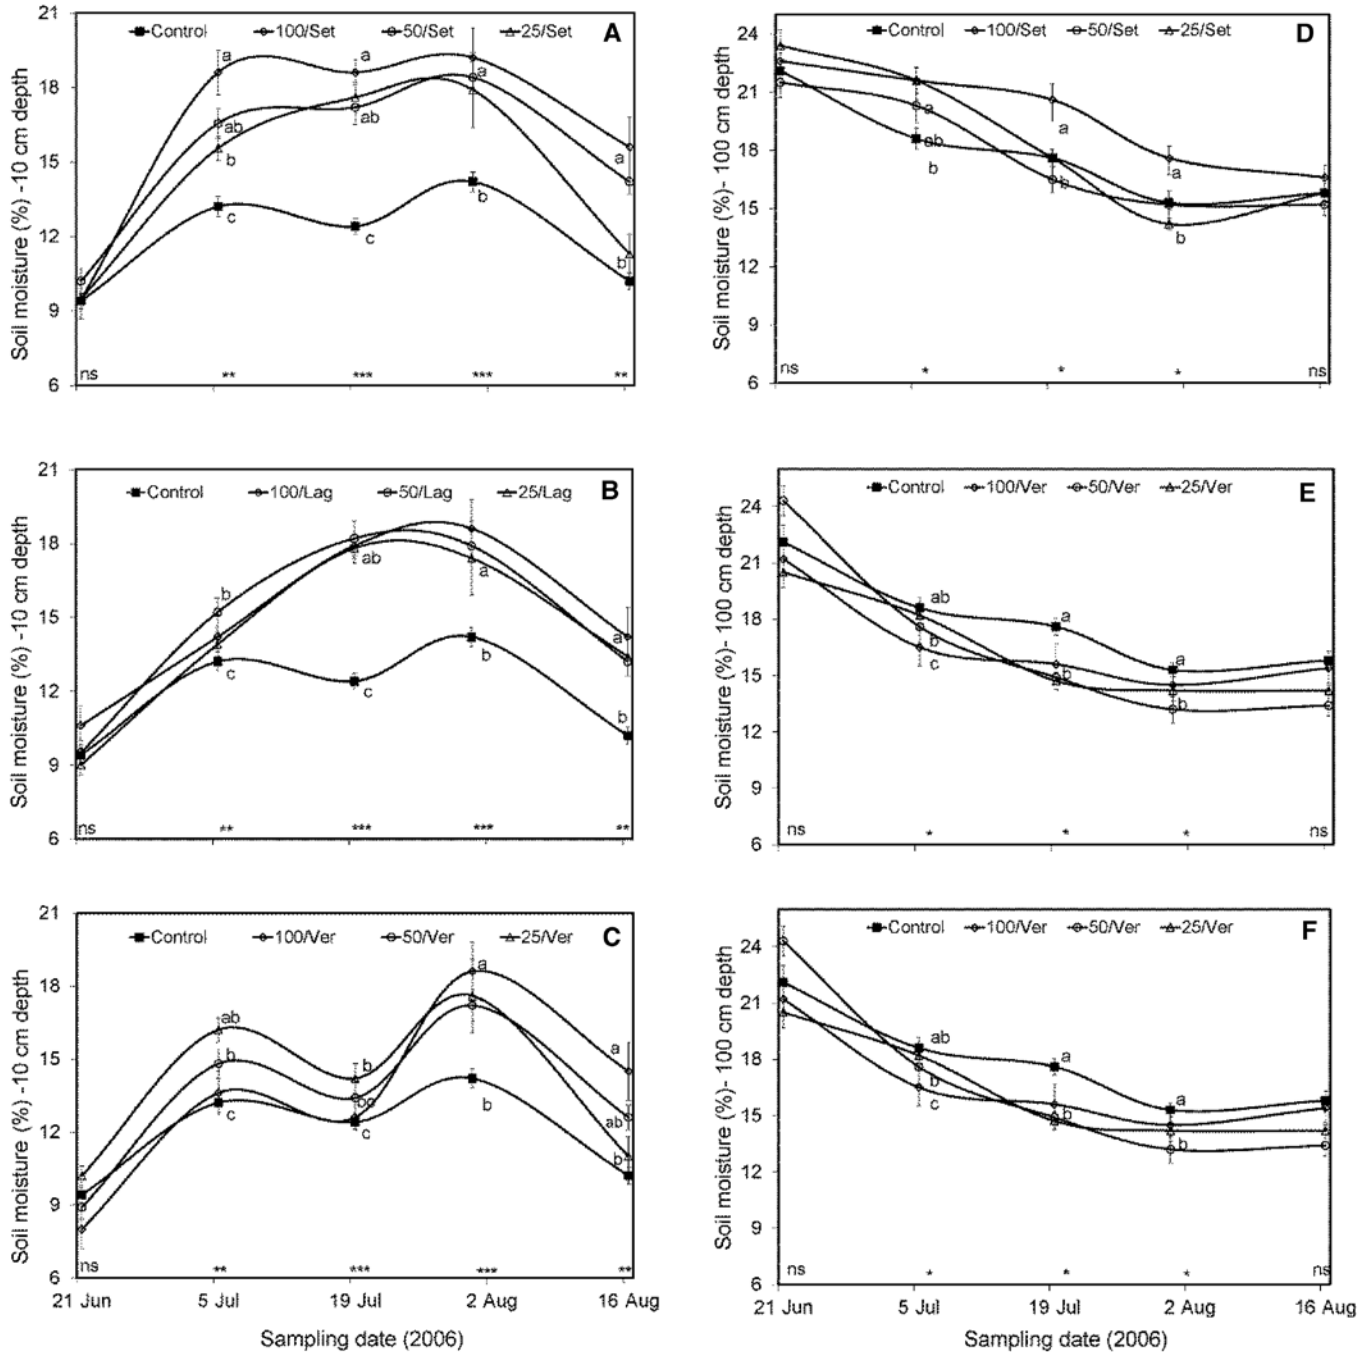

**Supplemental Figure 1** Impact of irrigation treatments on soil moisture (%) of a Baco noir vineyard. Soil moisture was measured in 2006 at Lambert Vineyards, Niagara-on-the-Lake, Ontario, using a Profile Probe type PR2 at a depth of 10 cm (A to C) or 100 cm (D to F). A/D, B/E, and C/F represent irrigation at the treatment initiation time (fruit set [Set], lag phase [Lag], and veraison [Ver], respectively), while 100, 50, and 25 are the percentages of soil water replacement lost through evapotranspiration. \*, \*\*, \*\*\*, and ns mean significant at  $p < 0.05$ , 0.01, 0.001, and not significant, respectively. Letters represent means separated at  $p < 0.05$  by Duncan's multiple-range test.

**Supplemental Data for:**

Balint G and Reynolds AG. 2017.

Irrigation strategies impact Baco noir grapevines in Ontario. I. Vine physiology, vine size, and yield components.

Am J Enol Vitic 68:293-309. doi: 10.5344/ajev.2017.16093.

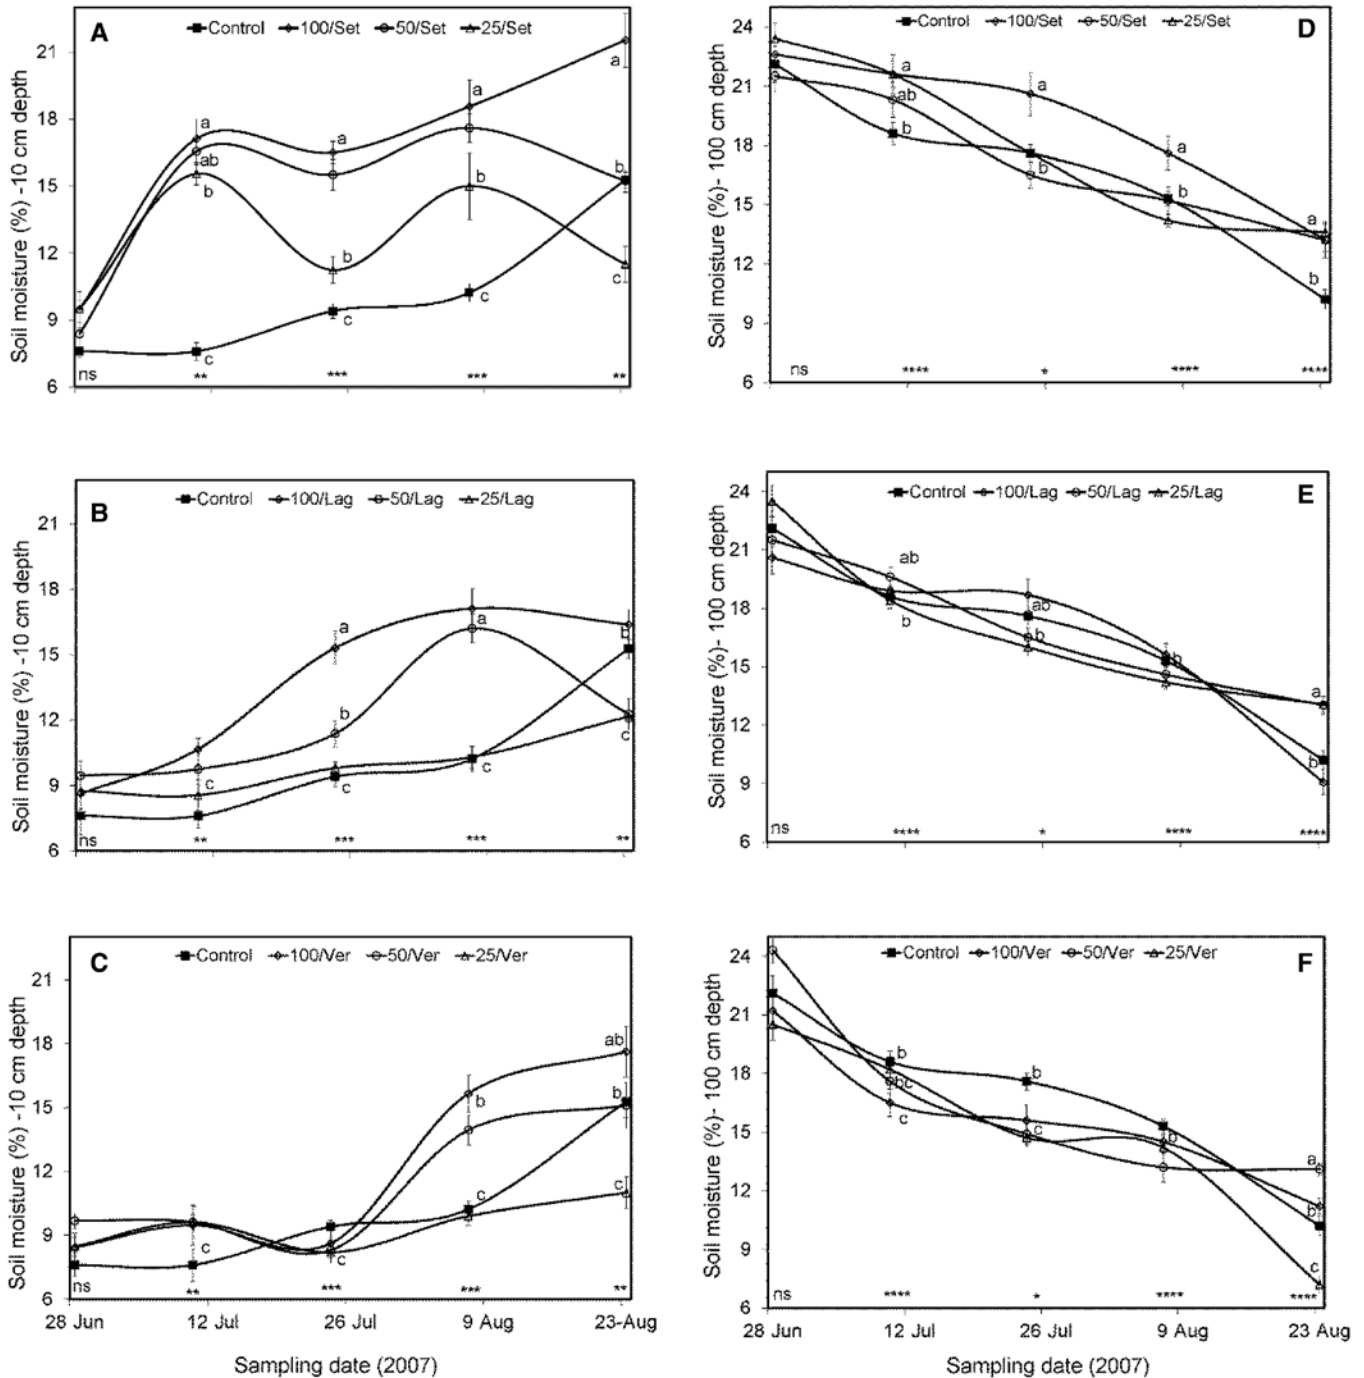

**Supplemental Figure 2** Impact of irrigation treatments on soil moisture (%) of a Baco noir vineyard. Soil moisture was measured in 2007 at Lambert Vineyards, Niagara-on-the-Lake, Ontario, using a Profile Probe type PR2 at a depth of 10 cm (A to C) or 100 cm (D to F). A/D, B/E, and C/F represent irrigation at the treatment initiation time (fruit set [Set], lag phase [Lag], and veraison [Ver], respectively), while 100, 50, and 25 are the percentages of soil water replacement lost through evapotranspiration. \*, \*\*, \*\*\*, \*\*\*\*, ns mean significant at  $p < 0.05$ , 0.01, 0.001, 0.0001, and not significant, respectively. Letters represent means separated at  $p < 0.05$  by Duncan's multiple-range test.

**Supplemental Data for:**

Balint G and Reynolds AG. 2017.

Irrigation strategies impact Baco noir grapevines in Ontario. I. Vine physiology, vine size, and yield components.

Am J Enol Vitic 68:293-309. doi: 10.5344/ajev.2017.16093.

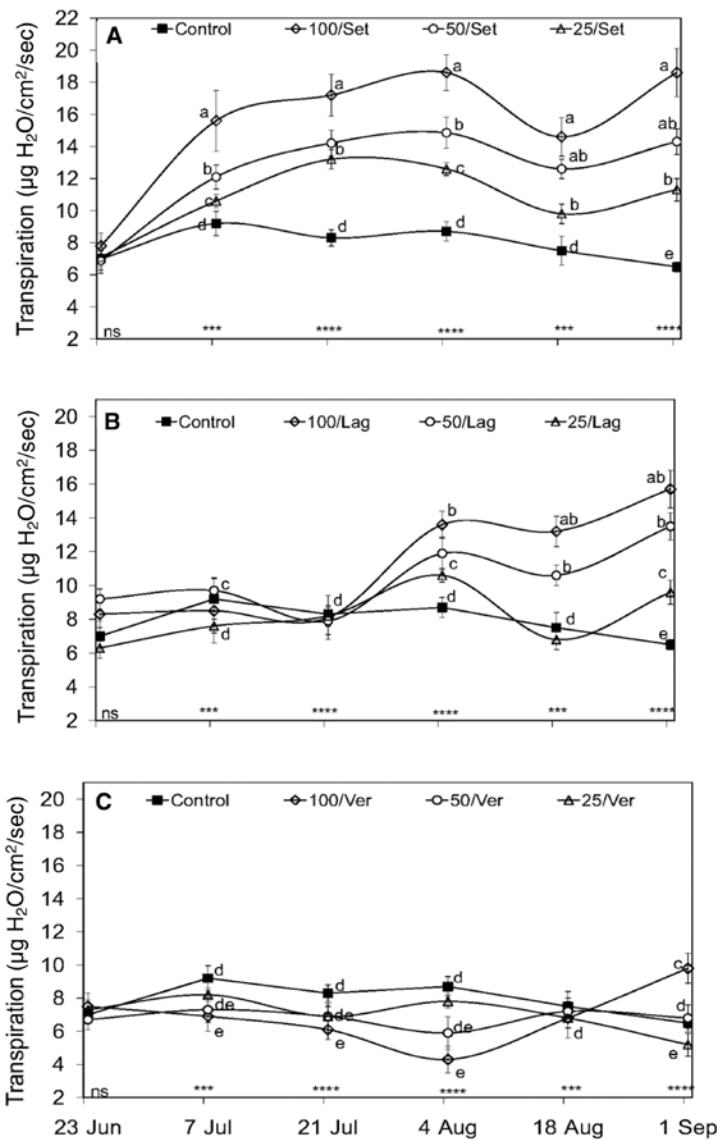

**Supplemental Figure 3** Impact of irrigation treatments on transpiration of Baco noir grapevines at Lambert Vineyards, Niagara-on-the-Lake, Ontario, in 2005. **A**, **B**, and **C** represent irrigation initiation time (fruit set [Set], lag phase [Lag], and veraison [Ver], respectively), while 100, 50, and 25 represent the percentage of soil water replacement lost through evapotranspiration. \*\*\*, \*\*\*\*, and ns mean significant at  $p \leq 0.001$ , 0.0001, and not significant, respectively. Letters represent means separated at  $p \leq 0.05$  by Duncan's multiple-range test.

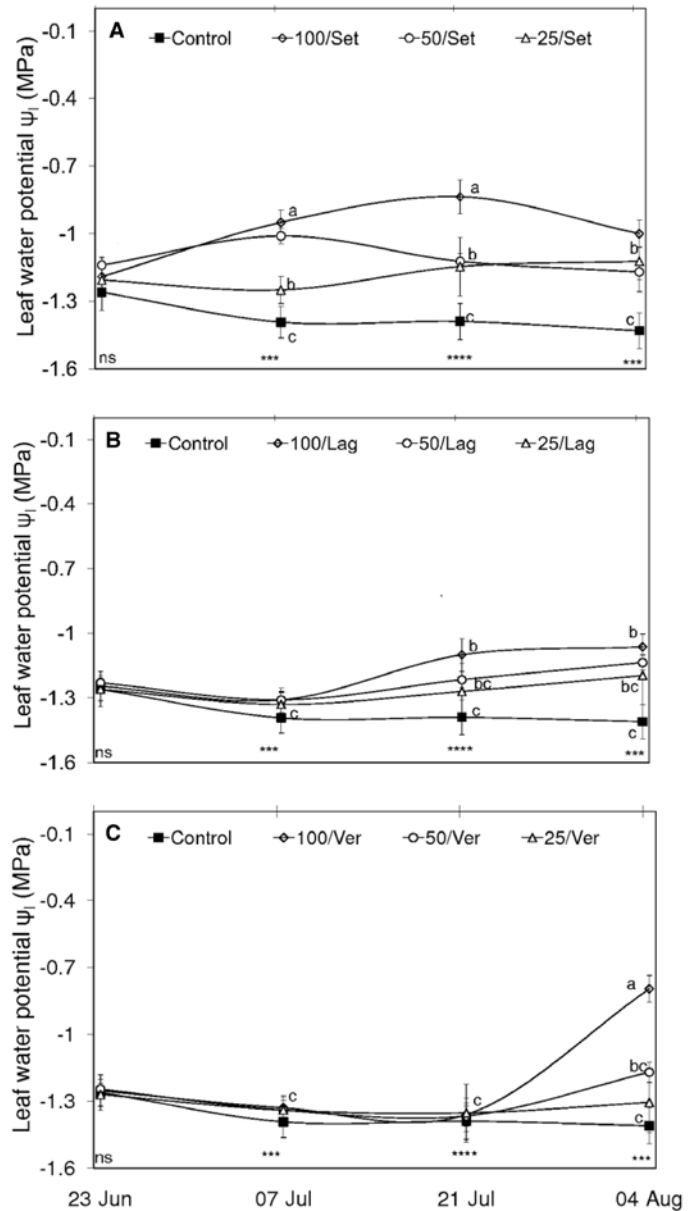

**Supplemental Figure 4** Impact of irrigation treatments on midday leaf water potential of Baco noir grapevines at Lambert Vineyards, Niagara-on-the-Lake, Ontario, in 2005. **A**, **B**, and **C** represent irrigation initiation time (fruit set [Set], lag phase [Lag], and veraison [Ver], respectively), while 100, 50, and 25 represent the percentage of soil water replacement lost through evapotranspiration. \*\*\*, \*\*\*\*, and ns mean significant at  $p \leq 0.001$ , 0.0001, and not significant, respectively. Letters represent means separated at  $p \leq 0.05$  by Duncan's multiple-range test.
